# Supplementary material
Source: publisher site journal article supplement (https://www.dovepress.com/article/374079)
Supplement: Supplementary file 1 [file get_supplementary_file.php]

## Table S1. MOOSE checklist

| **Section/Topic** | **MOOSE checklist Item(s)** | **Reported on Page #** |
| --- | --- | --- |
| **BACKGROUND** |  |  |
| Reporting of background should include | Problem definition. Hypothesis statement. Description of study outcome(s). Type of exposure or intervention used. Type of study designs used. Study population. | 1-2 |
| **SEARCH** |  |  |
| Reporting of search strategy should include | Search strategy, including time period included in the synthesis and keywords. Effort to include all available studies. Databases and registries searched. Use of hand searching (eg, reference lists of obtained articles). List of citations located and those excluded, including justification. Method of addressing articles published in languages other than English. | 2 |
| **METHODS** |  |  |
| Reporting of methods should include | Description of relevance or appropriateness of studies assembled for assessing the hypothesis to be tested. Rationale for the selection and coding of data (eg, sound clinical principles or convenience). Documentation of how data were classified and coded (eg, multiple raters, blinding, and interrater reliability). Assessment of confounding (eg, comparability of cases and controls in studies where appropriate). Assessment of study quality, including blinding of quality assessors; stratification or regression on possible predictors of study results. Assessment of heterogeneity. Description of statistical methods (eg, complete description of fixed or random effects models, justification of whether the chosen models account for predictors of study results, dose-response models, or cumulative meta-analysis) in sufficient detail to be replicated. Provision of appropriate tables and graphics. | 2-3 |
| **RESULTS** |  |  |
| Reporting of results should include | Graphic summarizing individual study estimates and overall estimate. Table giving descriptive information for each study included. Results of sensitivity testing (eg, subgroup analysis). Indication of statistical uncertainty of findings. | 3-4, Table 1, Table S2, Table S3, Figure 1, Figure S1, Figure S2 |
| **DISCUSSION** |  |  |
| Reporting of discussion should include | Quantitative assessment of bias (eg, publication bias). Justification for exclusion (eg, exclusion of non–English-language citations). Assessment of quality of included studies. | 4-6 |
| **CONCLUSIONS** |  |  |
| Reporting of conclusions should include | Consideration of alternative explanations for observed results. Generalization of the conclusions (ie, appropriate for the data presented and within the domain of the literature review). Guidelines for future research. Disclosure of funding source. | 6 |

Stroup DF, Berlin JA, Morton SC, et al. Meta-analysis of observational studies in epidemiology: a proposal for reporting. Meta-analysis Of Observational Studies in Epidemiology (MOOSE) group. *JAMA*. 2000;283(15):2008-2012.

**Table S2.** Characteristics of the included studies and data of each indicator.

| **Study** | **Size** | **Age** | **M/F** | **BMI (kg/m2)** | **Smoking history**  **(pack-years)** | **PB-FEV1%** | **DLCO%** | **FeNO**  **(ppb)** | **Serum**  **total IgE**  **(IU/mL, pg/mL)** | **Blood eosinophil**  **(cell/μL)** | **Sputum**  **eosinophil (%)** | **Sputum**  **neutrophil (%)** | **Circulating**  **YKL-40**  **(ng/ml)** | **Circulating**  **periostin**  **(ng/ml)** | **Circulating**  **NGAL**  **(ng/ml)** | **Study Design** | **Score** |
| --- | --- | --- | --- | --- | --- | --- | --- | --- | --- | --- | --- | --- | --- | --- | --- | --- | --- |
| Fu et al. 201418 | 42a  21b  16c | 67.9±7.3  69.9±7.4  66.1±7.5 | 21**/**21  8**/**13  6**/**10 | 29.2±6.7  27.9±8.6  30.3±6.4 | 40.6±36.1  29.0±23.8  7.9±15.0 | 54.6±19.5  52.1±14.0  83.7±8.1 | / | / | / | / | 2.22±3.38  1.5±2.15  3.17±3.33 | 63.84±31.09  66.17±25.6  32.79±31.54 | / | / | / | CS | 8 |
| Fu et al. 20147 | 55a  36b  8c | 68.6±7.6  70.1±7.7  66.1±6.6 | 27**/**28  12**/**24  3**/**5 | 28.8±6.4  28.6±7.1  30.3±6.5 | 34.9±27.9  34.4±26.3  12.6±22.3 | 54.6±18.2  55.9±16.2  81.6±6.8 | / | / | / | 135.4±76.1  171.1±154.4  200.0±178.7 | 2.33±3.43  1.11±1.31  2.46±4.2 | 61.35±27.03  72.18±28.57  46.35±37.97 | / | / | / | CO | 6 |
| Lee et al. 201419 | 97a  159c | 63.0±8.9  57.6±8.8 | 36**/**61  29**/**130 | 23.7±3.0  24.1±3.8 | 29.5±18.8  25.8±48.6 | 58.0±11.82  69.4±15.13 | 91.7±20.0  90.8±16.2 | / | 332.1±347.1  199.8±247.7 | 267.8±211.9  477.5±682.1 | / | / | / | / | / | CS | 6 |
| Carpagnano et al. 201620 | 23a  13b  14c | 63.8±6.9  71±4.58  60.8±12.4 | **/** | 29±5.2  29.5±4.3  28.8±5.8 | **/**  68.6±32.3  / | 71.94±23.21  46.76±10.66  88.67±17.72 | / | 25.43±14.25  17.69±4.12  21.61±11.40 | / | / | 3.29±2.71  0.55±1.34  47.34±26.55 | 81.84±10.82  88.26±10.70  24.26±20.14 | / | / | / | CS | 6 |
| Cosio et al. 201621 | 125a  706b | 66.5±8.7  67.8±8.9 | 102**/**23  588**/**118 | 29.1±5.5  27.8±5.5 | 53.2±26.2  56.6±28.7 | 61.2±18.1  59.3±20.7 | 78±22  73.8±24.1 | / | 206.6±232  115.7±273 | / | / | / | / | / | / | CO | 6 |
| Gao et al. 201622 | 18a  20b  24c | 61.8±6.5  59.3±7.0  58.3±8.3 | 12**/**6  12**/**8  9**/**15 | 28.2±6.5 24.6±4.0  26.0±4.5 | 42.5±17.7  37.2±17.3  13.0±16.0 | 51.6±13.7  58.3±19.1  78.8±14.0 | 67.9±18.7  53.2±20.2  82.2±17.8 | / | / | / | 6.8±9.8  2.4±4.9  5.1±9.2 | 64.8±15.5  62.8±20.3  53.6±23.4 | / | / | / | CS | 6 |
| Gao et al. 201622 | 17a  35b  21c | 65.9±8.9  72.2±8.1  42.0±15.4 | 14**/**3  34**/**1  4**/**17 | 24.2±3.2  23.5±3.0  24.6±5.4 | 40.7±16.6  47.6±21.9  4.3±12.5 | / | / | / | / | / | 9.2±17.1  3.2±8.7  12.0±17.4 | 66.1±24.8  72.4±17.4  46.2±26.0 | / | / | / | CS | 7 |
| Goto et al. 201623 | 48a  149b | 56±9.7  58±13.4 | **/** | **/** | 32±22.9  36±26.9 | 63±6.11  63.35±5.24 | / | / | / | 272±304.8  236±158.7 | / | / | / | / | / | CS | 6 |
| Kalinina et al. 201624 | 12a  44b  39c | 64.3±5.3  60.1±10.4  42.6±14.9 | 6**/**6  32**/**12  16**/**23 | 26.9±7.1  21.2±8.5  28.9±20.2 | 16.3±19.9  26.0±33.9  0.4±1.3 | 81.72±24.2  85.44±22.72  95.56±47.6 | / | / | 562±100.6  197.4±56.5  511.0±110.8 | / | / | / | / | / | / | CS | 8 |
| Bai et al. 201725 | 65a  65b | 62.6±8.7  64.7±9.5 | 62**/**3  62**/**3 | 22.8±5.4  21.0±4.6 | 48.1±50.4  47.8±30.5 | 36.1±13.4  36.8±15.4 | 70.7±24.8  55.9±24.9 | / | 368.8±605.8  208.7±302.0 | / | / | / | / | / | / | CS | 7 |
| Gao et al. 201726 | 72a  160b  142c | 59.5±15.8  71.8±8.5  46.2±16.5 | 53**/**19  132**/**28  56**/**86 | 22.4±3.2  20.5±3.5  23.2±3.8 | **/** | 61.97±15.33  42.39±18.90  85.55±12.83 | / | / | / | / | 8.64±13.23  1.99±2.72  8.98±15.08 | 77.43±22.62  91.15±8.03  68.09±35.83 | / | / | / | CS | 7 |
| Inoue et al. 20178 | 93a  915b | 69.2±9.8  73.9±8.0 | 84**/**9  853**/**62 | 22.8±3.4  22.2±3.5 | 46.0±27.7  58.1±31.5 | 64.2±18.2  56.0±21.2 | / | 33.1±17.5  26.4±21.7 | / | 368.3±362.8  226.1±213.6 | / | / | / | / | / | CS | 7 |
| Kawamatawong et al. 20179 | 44a  24b  24c | 69.4±34.5  71.4±33.1  59.7±29.9 | 23**/**21  18**/**6  4**/**20 | 28.2±18.7  22.4±13.6  28.6±13.3 | 28.6±53.7  11.8±23.6  51.8±94.6 | 67.2±18.0  65.6±20.2  68.3±11.8 | / | 52.54±29.04  72.22±30.21  53.94±23.51 | 747.2±1,243.6  471.6 ± 641.6  442.4 ± 432.4 | 271.4±159.5  255.5 ± 240.0  311.4±199.2 | / | / | / | / | / | CS | 6 |
| Kodama et al. 201727 | 21a  39b  15c | 66.8±8.4  72.7±6.9  56.4±13.7 | 9**/**12  34**/**5  3**/**12 | 22.8±6.5  22.0±0.5  24.8±3.3 | 16.1±24.5  66.8±33  10.1±14 | 68.7±19.1  55.6±19.0  96.0±13.3 | 70.2±17.7  43.1±14.5  74.4±13.8 | / | / | / | / | / | / | / | / | CO | 6 |
| Kurashima et al. 201728 | 256a  537b | 66.5±8.3  69.4±7.8 | 223**/**33  516**/**21 | 22.0±4.0  21.1±3.5 | 52.1±28.4  66.9±34.3 | 59.4±22.6  60.5±24.2 | / | / | / | / | / | / | / | / | / | CS | 6 |
| Lacedonia et al. 201729 | 8a  31b  13c | 63.3±9.0  70.3±8.0  52.5±13.2 | / | 27.7±3.0  28.5±5.0  29.2±7.67 | / | 67.00±16.83  52.68±19.40  75.77±22.45 | / | / | / | / | / | / | / | / | / | CS | 8 |
| Boulet et al. 201830 | 75a  40c | 61±10  64±9 | 28**/**47  25**/**15 | 29±6  28±5 | 36±13  3±2 | 56±13  61±11 | 75±19  89±22 | 17.9±12.7  24.5±19.0 | 127.38±171.63  163.91±178.39 | 230±170  260±230 | 3.43±5.2  9.77±17.78 | 56.18±29.29  51.81±37.22 | / | / | / | CS | 8 |
| de Llano et al. 201831 | 109a  89b  94c | 63.3±10.6  67.9±8.6  61.8±12.3 | 71**/**38  67**/**22  42**/**52 | 28.6±6  28.4±4.9  28.6±4.7 | 45.1±24  48.7±22.5  3.4±5.8 | 58.9±17  55.1±18.5  69.5±18.9 | 66.6±19.1  63.6±25.9  83.4±18.7 | 22.5±21  17.3±9.6  36.0±24.1 | 907.5±1875.2  826.9±1730.9  1062.0±2187.2 | 440.7±751.3  100.0±150.7  1620.3±3275.2 | / | / | / | 35.67±12.1  37.23±16.73  37.75±17.02 | / | CS | 8 |
| Duong-Quy et al. 201832 | 59a  74b  76c | 52±14  59±13  41±22 | 45**/**14  66**/**8  36**/**40 | 21.7±2.8  20.3±3.5  22.4±4.1 | 31±16  37±12  9±4 | 54±14  64±17  80±22 | 68±14  73±11  90±12 | 34±12  15±8  46±28 | / | / | / | / | / | / | / | CS | 8 |
| Ekerljung et al. 201833 | 181a  89b  651c | 59±12.5  62.4±11.2  45.9±15.3 | 83**/**98  52**/**37  242**/**409 | 27.1±4.6  25.4±4.0  27.4±5.0 | 24.5±16.4  23.9±16.2  14.5±13.9 | 76.2±18.1  86.8±15.6  100.4±12.8 | / | 24.5±24.8  19.8±11.6  26.9±23.6 | / | 270±270  190±140  230±160 | / | / | / | / | / | CC | 6 |
| Guo et al. 201834 | 53a  53b | 68.7±12.2  70.3±7.6 | 44**/**9  47**/**6 | / | 19.7±30.5  43.5±22.9 | 57.14±14.19  45.07±16.96 | / | 38.24±21.72  20.0±6.86 | / | / | 8.45±12.48  0.5±0.78 | 73.45±23.6  81.79±13.31 | / | / | / | CO | 7 |
| Jo et al. 201835 | 77a  60b | 72.5±7.4  74.0±8.1 | 56**/**21  50**/**10 | 24.3±3.4  22.2±3.1 | 27.4±20.7  26.7±22.0 | 77.6±16.6  71.1±15.8 | / | / | / | 230.9±361.8  188.7±286.2 | / | / | / | / | 15.6±6.6  15.9±7.9 | CO | 7 |
| Oh et al. 201836 | 37a  38b  32c | 64.2±11.2  67.7±10.0  56.9±15.4 | 33**/**4  37**/**1  12**/**20 | 24.4±4.6  22.3±2.5  23.9±4.2 | 33.1±18.9  43.1±16.2  0 | 61.62±17.35  59.08±31.2  90.68±19.01 | 85.03±23.91  72.09±39.52  99.53±15.91 | 22.17±19.67  18.36±10.79  24.85±13.97 | / | / | / | / | / | / | / | CS | 8 |
| Ojanguren et al. 201837 | 42a  262c | 52.0±9.0  39.5±10.7 | 32  175 | 27.9±5.5  28.2±5.7 | 28.6±15.8  6.5± 10.6 | 62.2±15.1  92.4±15.9 | / | / | / | 20±20  30±30 | / | / | / | / | / | CO | 6 |
| Park et al. 201838 | 47a  192b | 64.7±6.6  66.6±7.5 | 45**/**2  188**/**4 | 23.9±3.1  23.2±3.2 | 45.0±29.2  48.5±26.8 | 58.3±15.4  53.1±15.3 | / | / | / | / | / | / | / | / | / | CS | 5 |
| Shi et al. 201839 | 19a  25b  16c | 64.8±6.5  65.4±7.0  62.2±5.9 | 13**/**6  21**/**4  11**/**5 | 22.9±1.9  23.0±3.7  24.0±2.0 | / | 58.82±9.41  56.58±16.75  97.44±24.40 | / | 37.7±16.5  21.9±10.3  36.3±17.7 | / | 245.8±145.2  120.8±97.9  182.5±97.4 | / | / | / | / | / | CS | 6 |
| Takayama et al. 201840 | 56a  65b | 72.3±7.8  72.3±9.8 | 42**/**14  54**/**11 | 22.6±5.6  23.0±3.7 | 46.4±30.0  56.0±31.6 | 64.9±17.6  69.7±21.1 | / | 26.09±19.4  16.0±6.07 | / | 224.98±138.87  145.59±89.08 | / | / | / | / | / | CC | 6 |
| Wang et al. 201841 | 102a  147b  124c | 62.5±92  67.6±111  48.5±136 | 40**/**62  99**/**48  55**/**69 | 25.6±12.2  22.4±18.9  24.4±18.6 | 46.5±159  39.3±174  13.6±156 | 70.85±56.8  58.95±109.7  73.67±61.6 | / | / | / | 305±878.7  275±1576.2  345±846.3 | / | / | 11.4±3.77  16.13±6.3  10.44±2.54 | / | 113.27±54.34  138.85±79.53  84.76±17.63 | CS | 8 |
| Cai et al. 201942 | 29a  27b | 58.8±7.1  60.9±4.2 | 25**/**4  22**/**5 | 23.8±3.2  21.8±2.3 | / | 40.62±8.53  40.22±6.44 | / | 18.14±6.97  17.63±5.88 | / | / | / | / | / | / | / | CS | 7 |
| Chen et al. 201943 | 43a  135b | 61.6±9.9  66.9±8.7 | 30**/**13  112**/**23 | 22.2±3.1  21.2±3.6 | / | 36.88±9.62  35.53±9.51 | 46.58±13.39  41.50±13.30 | 26.13±14.91  20.99±9.16 | 151.17±43.45  199.16±30.79 | 230.37±215.24  232.53±206.91 |  |  |  |  |  | CO | 6 |
| Kyogoku et al. 201944 | 23a  33c | 71.2±6.4  65.7±11.5 | 21**/**2  16**/**17 | / | 49.1±22.8  13.5±18.5 | 64.2±19.1  99.1±15.7 | / | 30.6±16.1  33.2±22.6 | 594.55±766.86  253.03±282.08 | 281.3±176.6  301.6±222.0 | / | / | / | / | / | CO | 7 |
| Park et al. 201945 | 228a  731c | 57.6±13.3  46.2±15.8 | 143**/**85  271**/**460 | 24.1±3.1  24.0±3.6 | 19.7±25.5  4.6±10.3 | 71.02±19.02  87.72±19.53 | / | / | 367.73±548.46  389.09±617.78 | 343.93±383.27  383.29±400.66 | 15.15±21.30  13.52±16.94 | 24.37±24.58  28.64±28.95 | / | / | / | CS | 5 |
| Sevimli et al. 201946 | 40a  298c | 63.8±10.2  53.9±13 | 13**/**27  234**/**64 | / | 23±11.6  2.6±17.5 | 70.44±15.94  101.83±98.03 | / | / | / | / | / | / | / | / | / | CS | 8 |
| Shirai et al. 201910 | 115a  61b  177c | 69.3±9.0  73.7±6.8  56.9±20.9 | 91**/**24  49**/**12  52**/**125 | 23±3  21±3  23.4±3.7 | 28.6±27  47.8±34.9  0.4±0.8 | 68.84±25  67.43±27.87  91.42±17.86 | / | 27.21±22.52  13.74±9.26  27.06±20.18 | 462.02±582.6  58.66±67.58  236.96±275.06 | 317.5±212.47  153.64±76.69  286.31±232.45 | / | / | 89.85±92.12  120.36±128  39.2±32.29 | 61.66±21.7  53.86±14.88  59.39±15.77 | / | CS | 8 |
| Backer et al. 202047 | 126a  271b  859c | 64.0±12.0  68.0±8.9  44.0±21.5 | 51**/**75  116**/**155  379**/**480 | 27.9±6  26.2±6  26.2±5 | 31.4±18  38.3±18.6  10.8±11.9 | 67.45±19.5  55.97±22.36  90.65±15.59 | 66.2±17.6  53.5±20.6  87.8±15 | 17.05±11.25  13.2±9.69  20.1±14.85 | 80.97±104.32  72.32±112.54  104.47±146.28 | 200±150.0  200±149.1  200±148.5 | 2.59±4.12  1.45±2.61  2.47±3.92 | 44.84±34.35  62.38±30.56  39.65±36.39 | / | / | / | CS | 5 |
| Ding et al. 202048 | 21a  69c | 55.7±19.4  55.7±19.2 | 12**/**9  23**/**46 | / | 14.2±3.2  11.2±9.3 | / | / | / | 1431.0±2904.3  414.3±761.0 | 250±1191.5  280±2408.9 | / | / | / | / | / | CS | 5 |
| Gava et al. 202049 | 24a  53b | 67.2±8.4  66.0±8.9 | 19**/**5  37**/**16 | / | 48.6±28.9  54.1±33.6 | 45.8±17.3  45.1±15.7 | / | / | / | 400±200  100±80 | / | / | / | / | / | CS | 6 |
| Ghosh et al. 202050 | 35a  30b  34c | 54.0±5.9  55.0±6.1  51.9±7.2 | 35**/**0  30**/**0  34**/**0 | 21.0±1.7  20.8±1.6  21.4±1.6 | 29.9±5.7  35.0±5.6  16.8±4.9 | 59.1±9.8  57.6±10.2  70.4±11.3 | / | / | / | 628.7±1159.5  147.1±233.5  1464.1±2971.9 | / | / | 76.88±9.09  112.75 ±20.87  55.07 ±13.04 | 0.599±0.133  0.381±0.115  0.612±0.137 | 0.039±0.0036  0.034±0.0038  0.032±0.0038 | CS | 8 |
| Kang et al. 202051 | 749a  971b  283c | 60.4±9.7  65.8±8.6  55.1±9.2 | 483**/**266  805**/**166  133**/**150 | 23.4±3.5  22.4±3.7  24.1±3.4 | 39.1±27.1  42.9±28.8  28.8±23.7 | 55.57±17.87  49.85±20.18  65.20±19.24 | 77.66±28.56  0.12±0.11  0.26±0.207 | 38.1±31.91  25.7±20.61  59.9±53.69 | 331.62±538.38  200.05±424.75  269.64±421.01 | 270±270  190±170  310±320 | 11.43±14.74  2.97±2.95  13.73±13.18 | 45.62±29.91  63.81±19.35  38.19±14.48 | / | / | / | CS | 6 |
| Kobayashi et al. 202052 | 41a  346b | 71.4±6.6  74.9±7.4 | 36**/**5  318**/**28 | 24.9±4.4  23.3±3.7 | 47.5±28.7  58.3±29.7 | 67.1±21.4  61.6±21.2 | / | 33.4±20.8  21.8±13.3 | 708±1228  218±376 | 252±150  197±153 | / | / | / | / | / | CS | 7 |
| Kubysheva et al. 202053 | 57a  58b  32c | 61.8±8.6  63.1±9.6  58.0±7.9 | 23**/**34  50**/**8  5**/**27 | / | 36±17.9  36±18  / | 60.8±0.5  55.3±21.2  75.2±18.8 | / | / | / | / | / | / | / | / | / | CS | 6 |
| Li et al. 202054 | 48a  134b | 61.1±9.4  67.7±8.6 | 26**/**22  91**/**43 | 23.0±3.5  22.6±3.2 | / | 41.30±15.28  39.76±17.24 | / | 40.60±28.85  24.94±12.55 | / | 242.5±290.4  117.6±127.4 | / | / | / | / | / | CO | 6 |
| Lim et al. 202055 | 178a  935b | 68.8±8.5  69.4±7.7 | 152**/**26  860**/**75 | 23.7±3.0  23.1±3.3 | 40.4±24.2  42.1±25.0 | 71.3±21.6  64.0±20.3 | 78.4±20.6  73.4±22.8 | / | 276.2±542.2  307.2±544.8 | / | / | / | / | / | / | CS | 6 |
| Queiroz et al. 202056 | 37a  6b | 62.1±9.6  65.9±6.3 | **/** | 26.7±6.3  24.8±5.2 | 47.6±33.3  44.1±26.3 | 45.6±16.2  47.3±18.5 | / | / | 363.7±525.9  58.2±81.6 | 281.5±174.5  293.6±532.8 | / | / | / | / | / | CS | 6 |
| Chen et al. 202157 | 75a  153b | 69.2±10.6  68.8±10 | **/** | 24.2±5.3  24.2±4.3 | 50.5±31.9  55.7±36.7 | 61.5±18.4  62.1±19.4 | / | / | / | 312±273  213±492 | / | / | / | / | / | CS | 8 |
| Shi et al. 202158 | 129a  103c | 56±8  42±14 | 56**/**58  52**/**65 | 23.7±3.0  24.1±3.7 | 10.3±18.7  1.2±2.5 | 69.7±21.2  93.5±19.9 | / | 41.98±30.36  52.07±49.32 | / | 305.5±374.8  300.0±300.8 | 3.52±5.32  3.45±5.71 | 4.52±8.62  2.05±3.91 | / | / | / | CS | 6 |
| Toyota et al. 202159 | 34a  42b | 72.5±7.6  74.3±7.8 | 28**/**6  34**/**8 | 24.1±3.5  22.3±3.9 | 55.7±33.8  62.0±33.7 | 72.9±23.9  79.6±24.0 | / | 33.8±14.9  20.7±14.9 | 375±482.5  258±486.1 | 248±166.6  218±168.5 | / | / | / | / | / | CS | 8 |
| Lei et al  202260 | 338a  3920b | 66.5±10.4  70.5±9.2 | 232/106  3132/788 | 23.2±3.8  21.8±3.5 | / | 50.0±20.9  40.8±21.5 | / |  |  | 194.9±223.4  110.5±140.9 |  |  |  |  |  | CO | 7 |
| Tamura et al  202261 | 40a  41b  49c | 73.9±10.8  74.9±8.5  63.6±13.8 | 35/5  36/5  19/30 | 22.3±3.7  22.5±3.5  23.8±4.9 | 43.5±20.8  49.7±20.7  4.3±9.2 | 60.1±21.5  70.1±28.8  77.4±18.2 | / | 41.78±34.99  23.97±10.37  41.67±36.89 | 260.68±296.81  132.25±186.68  355.88±533.87 | 264.7±273.0  161.6±104.5  200.9±258.9 | 2.61±4.08  0.28±0.61  4.03±7.56 | 92.50±8.92  97.97±3.46  92.26±9.17 |  |  |  | CC | 6 |

**Notes**: aACO, bCOPD, cAsthma. Data were presented with mean ± SD. “/”: not reported.

**Abbreviations**: ACO, asthma-COPD overlap; BMI, body mass index; COPD, chronic obstructive pulmonary disease; CO, cohort; CC, case-control; CS, cross-section; DLCO%, diffusion lung capacity for carbon monoxide as a percentage of predicted value; FeNO, fractional exhaled nitric oxide; IgE, Immunoglobulin E; M/F, male/female; NGAL, neutrophil gelatinase-associated lipocalin; PB-FEV1%, post-bronchodilator forced expiratory volume in the first second as a percentage of predicted value.

**Table S3.** Results of linkage bias analyses for the population of the included studies linked to our research.

| **Studies that provide File Aa** | **Is File A expected contain patients not represented in File Bb?** | **Is File B expected contain patients not represented in File A?** | **Linkage structurec** | **What are the implications of the linkage bias?** |
| --- | --- | --- | --- | --- |
| Fu et al. 201418 | No | Yes | Nested | Potential misclassification or measurement error |
| Fu et al. 20147 | No | Yes | Nested | Potential misclassification or measurement error |
| Lee et al. 201419 | Yes | No | Nested | Potential misclassification or measurement error |
| Carpagnano et al. 201620 | Yes | Yes | Imperfect nestd | Potential misclassification or measurement error |
| Cosio et al. 201621 | Yes | Yes | Imperfect nest | Potential misclassification or measurement error |
| Gao et al. 201622 | No | Yes | Nested | Potential misclassification or measurement error |
| Goto et al. 201623 | Yes | Yes | Imperfect nest | Potential misclassification or measurement error |
| Kalinina et al. 201624 | No | Yes | Nested | Potential misclassification or measurement error |
| Bai et al. 201725 | No | Yes | Nested | Potential misclassification or measurement error |
| Gao et al. 201726 | No | Yes | Nested | Potential misclassification or measurement error |
| Inoue et al. 20178 | Yes | Yes | Imperfect nest | Potential misclassification or measurement error |
| Kawamatawong et al. 20179 | Yes | Yes | Imperfect nest | Potential misclassification or measurement error |
| Kodama et al. 201727 | No | Yes | Nested | Potential misclassification or measurement error |
| Kurashima et al. 201728 | Yes | Yes | Imperfect nest | Potential misclassification or measurement error |
| Lacedonia et al. 201729 | Yes | Yes | Imperfect nest | Potential misclassification or measurement error |
| Boulet et al. 201830 | Yes | No | Nested | Potential misclassification or measurement error |
| de Llano et al. 201831 | Yes | Yes | Imperfect nest | Potential misclassification or measurement error |
| Duong-Quy et al. 201832 | Yes | No | Nested | Potential misclassification or measurement error |
| Ekerljung et al. 201833 | Yes | Yes | Imperfect nest | Potential misclassification or measurement error |
| Guo et al. 201834 | Yes | Yes | Imperfect nest | Potential misclassification or measurement error |
| Jo et al. 201835 | No | Yes | Nested | Potential misclassification or measurement error |
| Oh et al. 201836 | Yes | Yes | Imperfect nest | Potential misclassification or measurement error |
| Ojanguren et al. 201837 | Yes | Yes | Imperfect nest | Potential misclassification or measurement error |
| Park et al. 201838 | Yes | Yes | Imperfect nest | Potential misclassification or measurement error |
| Shi et al. 201839 | No | Yes | Nested | Potential misclassification or measurement error |
| Takayama et al. 201840 | No | Yes | Nested | Potential misclassification or measurement error |
| Wang et al. 201841 | No | Yes | Nested | Potential misclassification or measurement error |
| Cai et al. 201942 | No | Yes | Nested | Potential misclassification or measurement error |
| Chen et al. 201943 | No | Yes | Nested | Potential misclassification or measurement error |
| Kyogoku et al. 201944 | Yes | Yes | Imperfect nest | Potential misclassification or measurement error |
| Park et al. 201945 | No | Yes | Nested | Potential misclassification or measurement error |
| Sevimli et al. 201946 | Yes | Yes | Imperfect nest | Potential misclassification or measurement error |
| Shirai et al. 201910 | Yes | Yes | Imperfect nest | Potential misclassification or measurement error |
| Backer et al. 202047 | No | Yes | Nested | Potential misclassification or measurement error |
| Ding et al. 202048 | No | Yes | Nested | Potential misclassification or measurement error |
| Gava et al. 202049 | Yes | Yes | Imperfect nest | Potential misclassification or measurement error |
| Ghosh et al. 202050 | Yes | Yes | Imperfect nest | Potential misclassification or measurement error |
| Kang et al. 202051 | No | Yes | Nested | Potential misclassification or measurement error |
| Kobayashi et al. 202052 | No | Yes | Nested | Potential misclassification or measurement error |
| Kubysheva et al. 202053 | No | Yes | Nested | Potential misclassification or measurement error |
| Li et al. 202054 | No | Yes | Nested | Potential misclassification or measurement error |
| Lim et al. 202055 | No | Yes | Nested | Potential misclassification or measurement error |
| Queiroz et al. 202056 | Yes | Yes | Imperfect nest | Potential misclassification or measurement error |
| Chen et al. 202157 | Yes | Yes | Imperfect nest | Potential misclassification or measurement error |
| Shi et al. 202158 | No | Yes | Nested | Potential misclassification or measurement error |
| Toyota et al. 202159 | Yes | Yes | Imperfect nest | Potential misclassification or measurement error |
| Lei et al. 202260 | No | Yes | Nested | Potential misclassification or measurement error |
| Tamura et al. 202261 | Yes | No | Nested | Potential misclassification or measurement error |

**Notes**: aFile A refers to the actual group of patients with asthma-chronic obstructive pulmonary disease overlap (ACO) identified by the criteria of the original study; bFile B refers to the expected group of ACO patients identified by our criteria among the population in the corresponding study; cOnly File A will be included in the study regardless of File B. dLinkage cannot be meaningfully interpreted due to detailed records of each patient was not provided by the included studies.


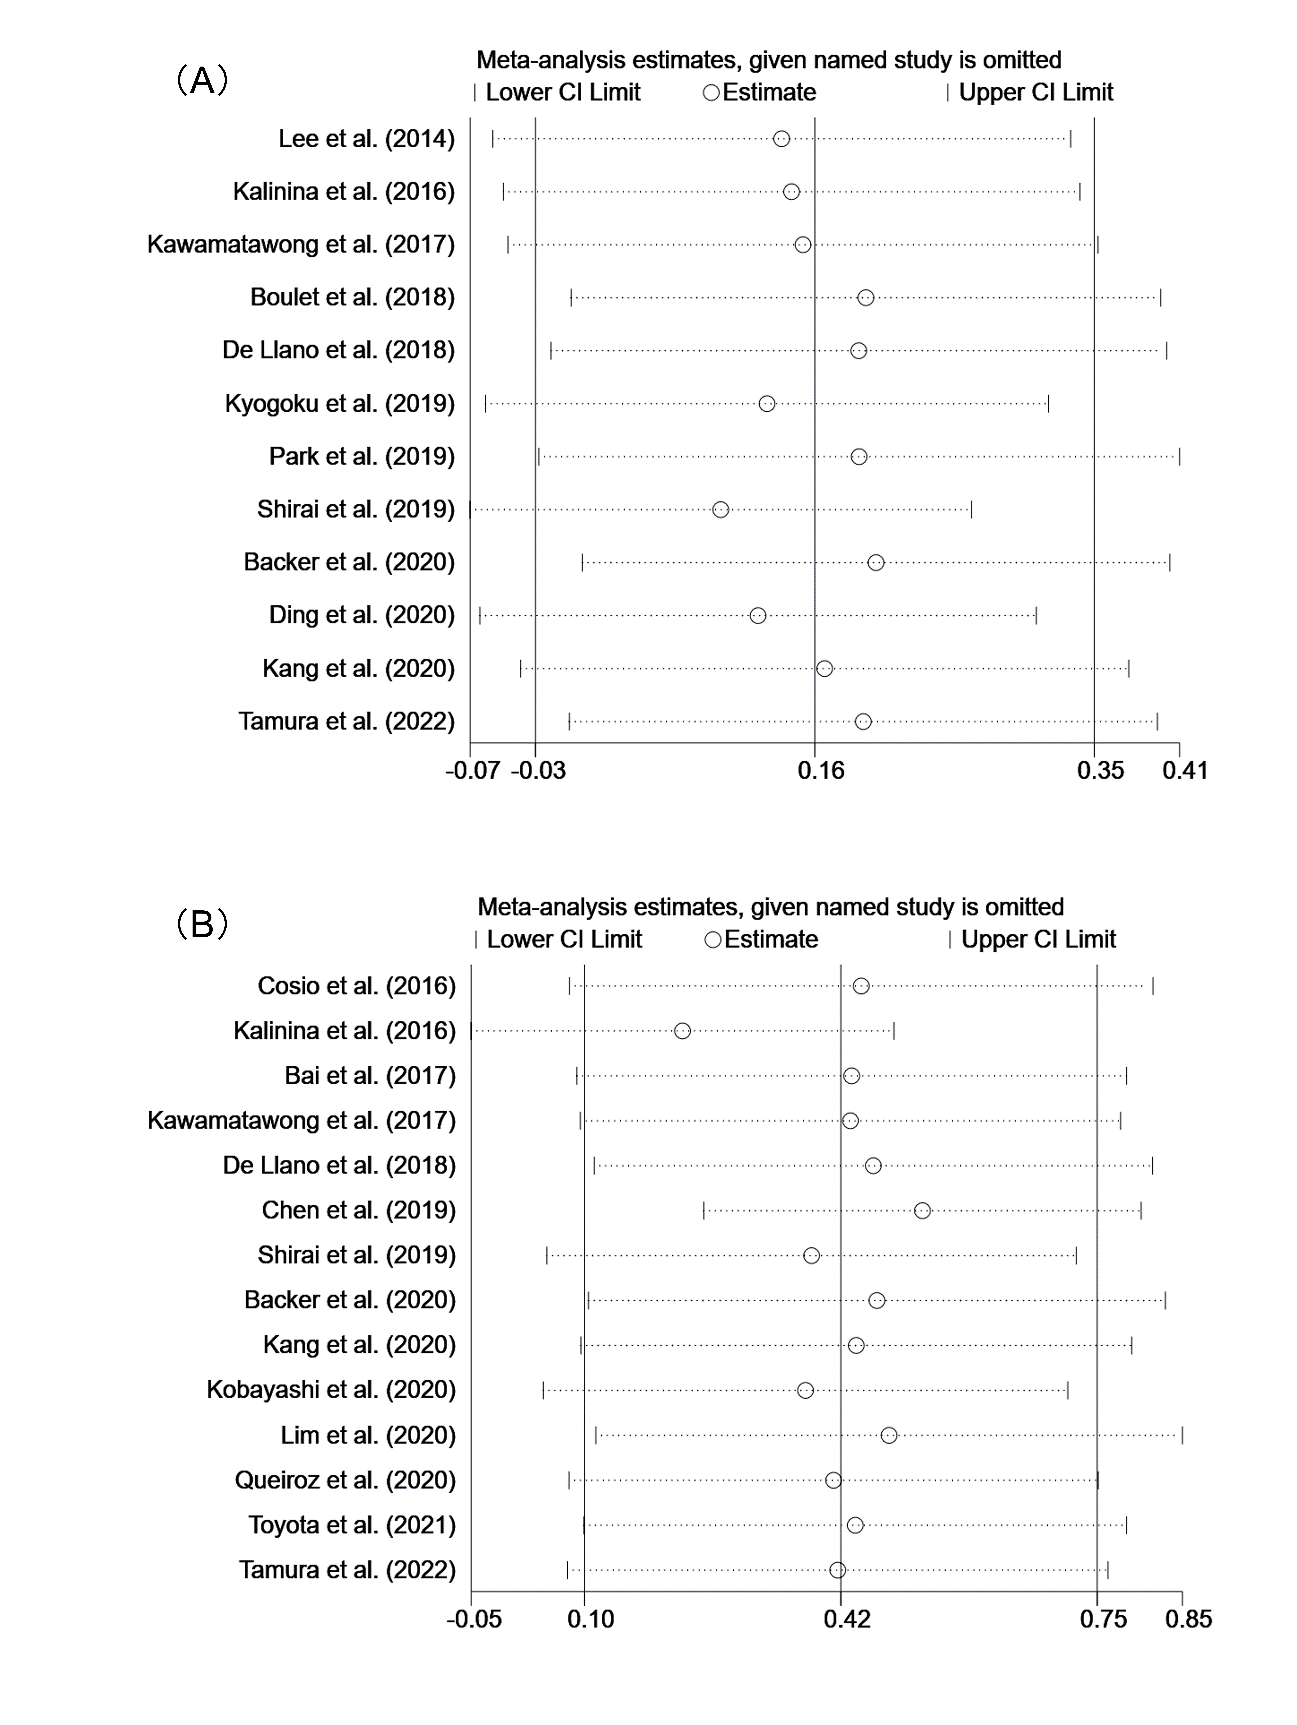


**Figure S1**. The sensitivity analysis on the pooled results of serum total immunoglobulin E. **(A)** Asthma-COPD overlap (ACO) vs pure asthma; **(B)** ACO vs pure chronic obstructive pulmonary disease (COPD).

**Abbreviations**: CI, confidence interval.


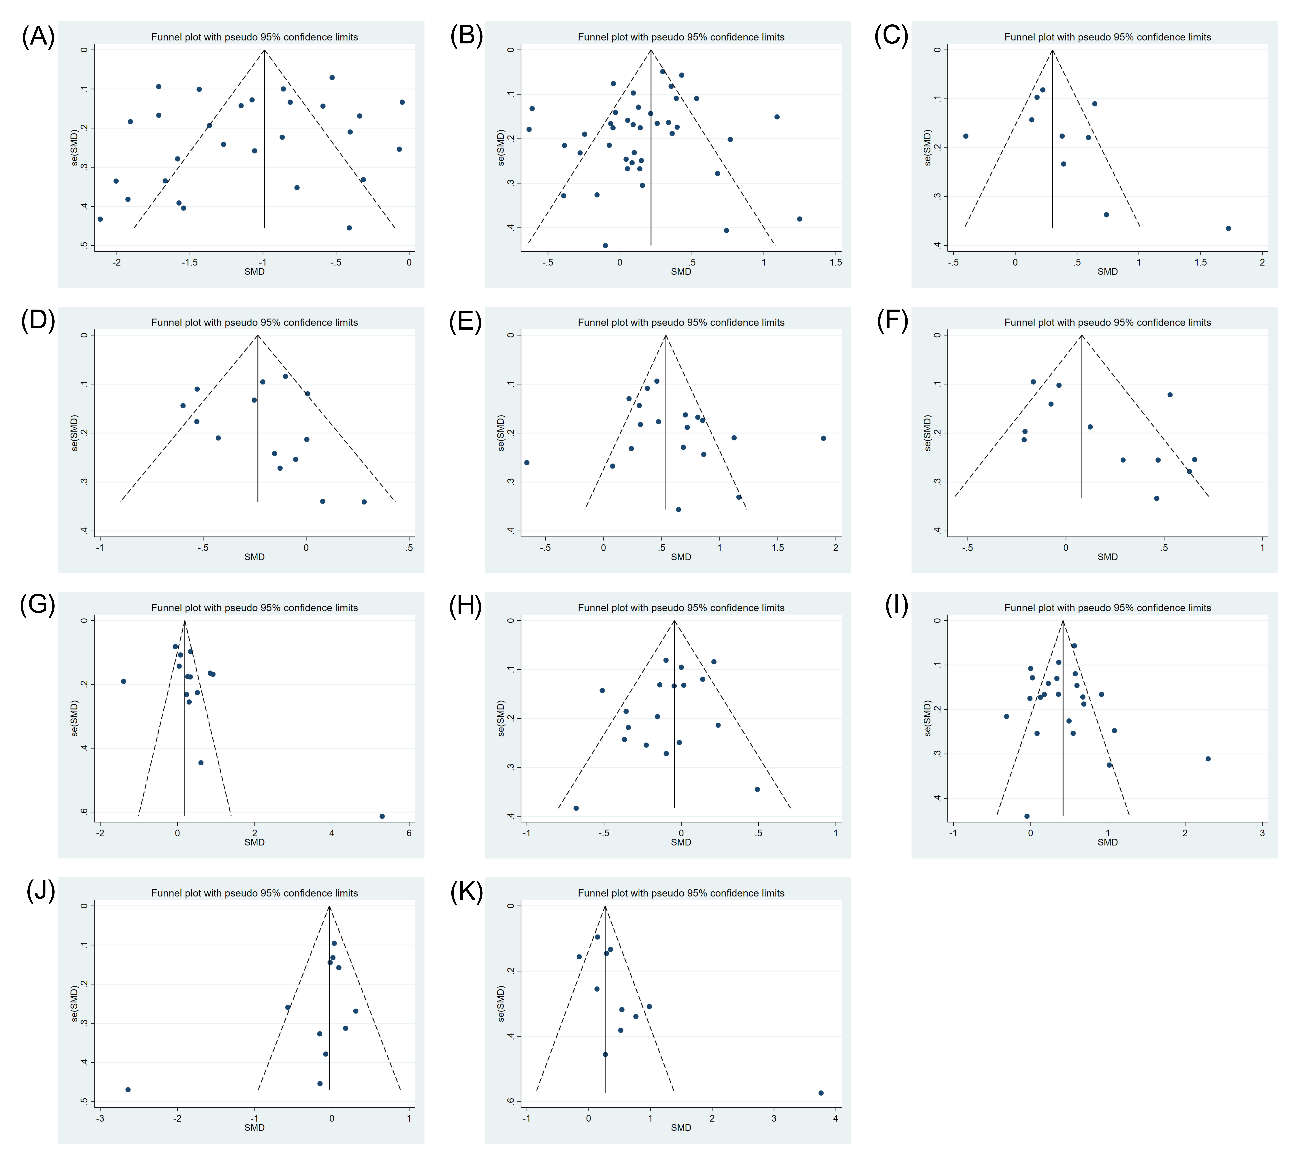


**Figure S2**.The funnel plots of the pooled results of each indicator. **(A)** Forced expiratory volume in the first second (FEV1)% predicted (pred), asthma-COPD overlap (ACO) vs pure asthma; **(B)** FEV1% pred, ACO vs pure chronic obstructive pulmonary disease (COPD); **(C)** Diffusing capacity of the lungs for carbon monoxide (DLCO)% pred, ACO vs pure COPD; **(D)** Fractional exhaled nitric oxide (FeNO), ACO vs pure asthma; **(E)** FeNO, ACO vs pure COPD; **(F)** Serum total immunoglobulin (Ig) E, ACO vs pure asthma; **(G)** Serum total IgE, ACO vs pure COPD; **(H)** Blood eosinophil counts, ACO vs pure asthma; **(I)** Blood eosinophil counts, ACO vs pure COPD; **(J)** Induced sputum eosinophils, ACO vs pure asthma; **(K)** Induced sputum neutrophils, ACO vs pure asthma.

**Abbreviations**: SMD, standardized mean difference.
